# Supplementary material for: A Recurrent BRCA2 Mutation Explains the Majority of Hereditary Breast and Ovarian Cancer Syndrome Cases in Puerto Rico
Source: MDPI journal article supplement (doi:10.3390/cancers10110419), 2018-11-02
Supplement: s1 [file s1]

# Supplementary Materials: A Recurrent *BRCA2* Mutation Explains the Majority of Hereditary Breast and Ovarian Cancer Syndrome Cases in Puerto Rico

Hector J. Diaz-Zabala, Ana P. Ortiz, Lisa Garland, Kristine Jones, Cynthia M. Perez, Edna Mora, Nelly Arroyo, Taras K. Oleksyk, Miguel Echenique, Jaime L. Matta, Michael Dean and Julie Dutil

**Table S1.** Demographic, reproductive and hormonal characteristics of the study population.

| Variable                                | % (n)      |
|-----------------------------------------|------------|
| <i>Demographic</i>                      |            |
| Age                                     |            |
| <40 yrs                                 | 10.8 (32)  |
| 40–49                                   | 22.7 (67)  |
| 50–59                                   | 31.2 (92)  |
| 60–69                                   | 24.4 (72)  |
| ≥70                                     | 10.8 (32)  |
| BMI                                     |            |
| <25                                     | 28.2 (83)  |
| 25–29                                   | 38.1 (112) |
| ≥30                                     | 33.7 (99)  |
| Civil status                            |            |
| Single                                  | 20.0 (59)  |
| Married/Union                           | 53.2 (157) |
| Divorced/Separated                      | 15.3 (45)  |
| Widow                                   | 11.5 (34)  |
| Education level                         |            |
| Up to high school                       | 40.2 (103) |
| Associate                               | 22.7 (58)  |
| Bachelor                                | 37.1 (95)  |
| <i>Hormonal &amp; pregnancy history</i> |            |
| Age at menarche                         |            |
| ≥13                                     | 43.1 (125) |
| <13                                     | 56.9 (165) |
| Oophorectomy                            |            |
| None or unilateral                      | 83.2 (242) |
| Bilateral                               | 16.8 (49)  |
| Oral contraceptive                      |            |
| Never used                              | 45.2 (131) |
| Ever used                               | 54.8 (159) |
| Pregnancy                               |            |
| Ever been pregnant                      | 88.8 (261) |
| Never been pregnant                     | 11.2 (33)  |

|                              |            |
|------------------------------|------------|
| Number of children           |            |
| Nulliparous                  | 14.7 (40)  |
| 1–2                          | 44.7 (131) |
| ≥3                           | 41.6 (122) |
| Menopause <sup>1</sup>       |            |
| Premenopausal                | 32.8 (95)  |
| Peri-/post-menopausal        | 67.2 (195) |
| Estrogen replacement therapy |            |
| Ever used                    | 16.7 (44)  |
| Never used                   | 83.3 (219) |

<sup>1</sup>Peri-/post-menopause includes natural and induced menopause. The total number of subjects varies across variables because of missing values (n missing was age 12, BMI 13, civil status 12, education level 51, age at menarche 17, oophorectomy 16, oral contraceptives 17, pregnancy 13, number of children 14, menopause 17, estrogen replacement therapy 44. BMI body mass index.

**Table S2.** Breast tumor pathology and family history characteristics of the study population.

| Variable                           | % (n)      |
|------------------------------------|------------|
| <i>Breast tumor pathology</i>      |            |
| Age at diagnosis                   |            |
| ≤50                                | 39.7 (116) |
| >50                                | 60.3 (176) |
| Site/type                          |            |
| Ductal carc. in situ               | 21.5 (55)  |
| Ductal invasive carc.              | 71.1 (182) |
| Lobular invasive carc.             | 7.4 (19)   |
| Size (centimeters)                 |            |
| ≤2                                 | 64.4 (121) |
| >2                                 | 35.6 (67)  |
| Lymph nodes                        |            |
| Negative                           | 67.7 (105) |
| Positive                           | 32.3 (50)  |
| ER                                 |            |
| Negative                           | 36.1 (83)  |
| Positive                           | 63.9 (147) |
| PR                                 |            |
| Negative                           | 38.9 (68)  |
| Positive                           | 71.1 (167) |
| HER2                               |            |
| Negative                           | 66.8 (135) |
| Positive                           | 33.2 (67)  |
| <i>Family history</i> <sup>1</sup> |            |
| Breast cancer                      |            |
| None                               | 69.6 (204) |
| At least one relative              | 30.4 (89)  |

|                                                          |  |            |
|----------------------------------------------------------|--|------------|
| Male breast cancer                                       |  |            |
| None                                                     |  | 98.3 (288) |
| At least one relative                                    |  | 1.7 (5)    |
| Ovarian cancer                                           |  |            |
| None                                                     |  | 96.9 (284) |
| At least one relative                                    |  | 3.1 (9)    |
| Other BRCA-associated cancers <sup>2</sup>               |  |            |
| None                                                     |  | 81.2 (238) |
| At least one relative                                    |  | 18.8 (55)  |
| Other cancers                                            |  |            |
| None                                                     |  | 47.1 (138) |
| At least one relative                                    |  | 52.9 (155) |
| Meet NCCN criteria for BRCA genetic testing <sup>3</sup> |  |            |
| Yes                                                      |  | 45.9 (124) |
| No                                                       |  | 54.1 (146) |

<sup>1</sup> Includes first-, second- and third- degree relatives on paternal and maternal side. <sup>2</sup> Other BRCA-associated cancers included pancreatic cancer, prostate cancer and melanoma. <sup>3</sup> Version 2.2017. The total number of subjects varies across variables because of missing values (n missing was age at diagnosis 15, site/type 51, size 119, lymph nodes 152, ER 77, PR 72, HER2 105, family history 14, NCCN criteria 37. Carc. carcinoma, ER estrogen receptor, progesterone receptor PR, human epithelial growth factor HER2, NCCN National Comprehensive Cancer Network.

**Table S3.** *BRCA1* and *BRCA2* intronic variants of uncertain significance.

| Gene         | Exon | HGVS cDNA                       | HGVS_Genomic <sup>1</sup>       | No obs. <sup>2</sup> | dbSNP ID    | ExAC Frequencies      |                       |                       |                       | ClinVar <sup>3</sup> |
|--------------|------|---------------------------------|---------------------------------|----------------------|-------------|-----------------------|-----------------------|-----------------------|-----------------------|----------------------|
|              |      |                                 |                                 |                      |             | Overall               | Eur                   | Afr                   | Lat                   |                      |
| <i>BRCA1</i> | 7    | c.441 + 41C>T                   | g.41256098G>A                   | 7                    | rs45489593  | 2.4x10 <sup>-04</sup> | 2.4x10 <sup>-04</sup> | 0                     | 3.8x10 <sup>-04</sup> | VUS                  |
|              | 7    | c.441 + 52T>C/<br>c.441 + 51C>T | g.41256087_<br>41256088delinsAG | 14                   | NA          | NA                    | NA                    | NA                    | NA                    | NA                   |
|              | 9    | c.548-9_548-9delA               | g.41249315delT                  | 1                    | rs273902774 | NA                    | NA                    | NA                    | NA                    | Conflicting          |
|              | 19   | c.5312 + 22C>T                  | g.41215328G>A                   | 1                    | rs8176260   | 7.6x10 <sup>-05</sup> | 0                     | 8.9x10 <sup>-04</sup> | 0                     | VUS                  |
| <i>BRCA2</i> | 2    | c.-15A>C                        | g.32890583A>C                   | 1                    | rs138705202 | 2.2x10 <sup>-04</sup> | 0                     | 2.2x10 <sup>-03</sup> | 2.6x10 <sup>-04</sup> | Conflicting          |
|              | 3    | c.68-7insA                      | g.32893207insA                  | 1                    | NA          | 2.4x10 <sup>-03</sup> | 5.5x10 <sup>-03</sup> | 3.2x10 <sup>-04</sup> | 1.0x10 <sup>-03</sup> | NA                   |
|              | 10   | c.1909 + 141A>G                 | g.32907673A>G                   | 1                    | NA          | NA                    | NA                    | NA                    | NA                    | NA                   |
|              | 11   | c.6841 + 55T>G                  | g.32915388                      | 1                    | NA          | NA                    | NA                    | NA                    | NA                    | NA                   |
|              | 13   | c.7007 + 53G>A                  | g.32921086                      | 1                    | rs56014558  | NA                    | NA                    | NA                    | NA                    | NA                   |
|              | 24   | c.9256 + 58A>T                  | g.32954340A>T                   | 1                    | NA          | NA                    | NA                    | NA                    | NA                    | NA                   |
|              | 26   | c.9502-40T>A                    | g.32970995T>A                   | 1                    | NA          | NA                    | NA                    | NA                    | NA                    | NA                   |

<sup>1</sup> Refers to position on genome assembly hg19/ GRCh37. <sup>2</sup> Number of observations in the current study. <sup>3</sup> Conflicting ClinVar classification refers to variants for which there were contradictory classifications as benign or uncertain significance depending on the source of the clinical report. Afr African, Eur European, Lat Latino, VUS variant of uncertain significan.

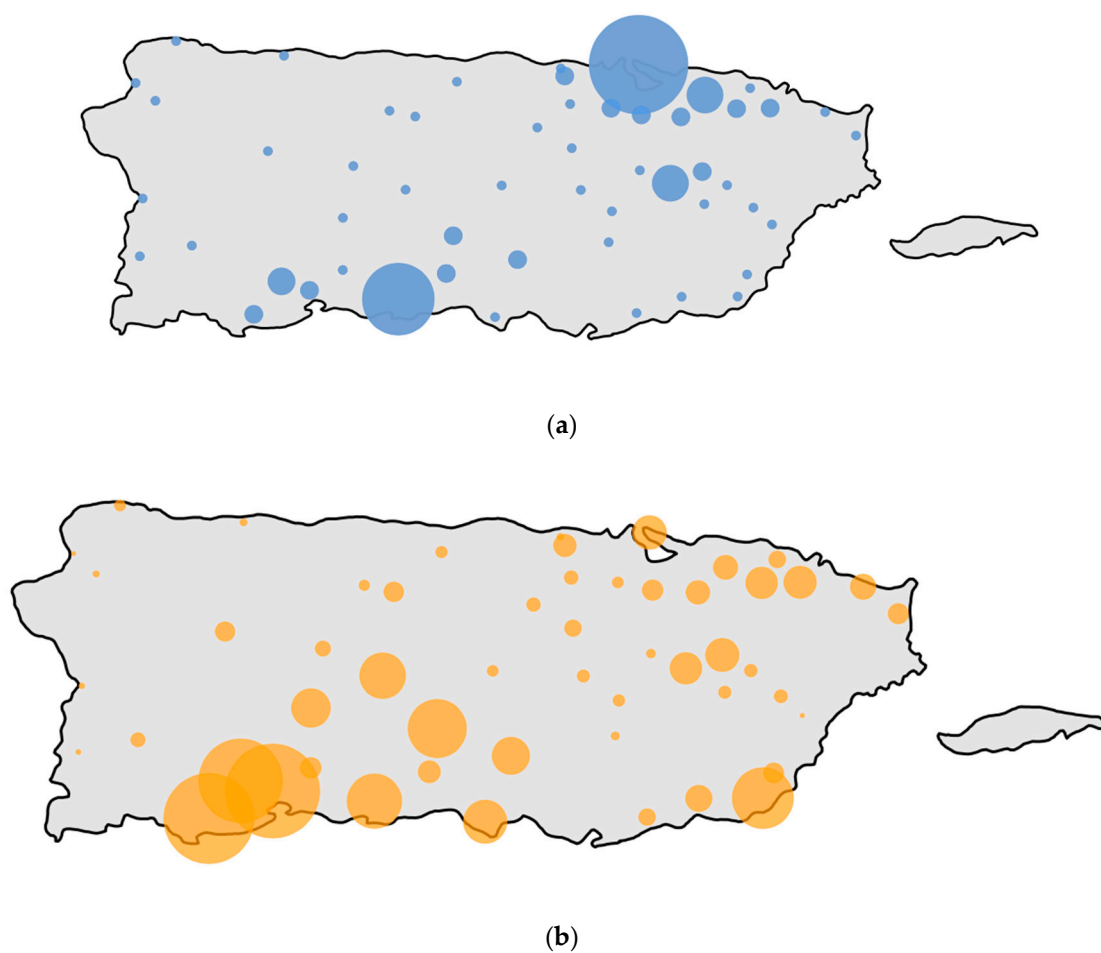

**Figure S1.** Geographic distribution of the study population. Measured by municipality of residence, and expressed as (a) absolute counts and (b) relative to population density.

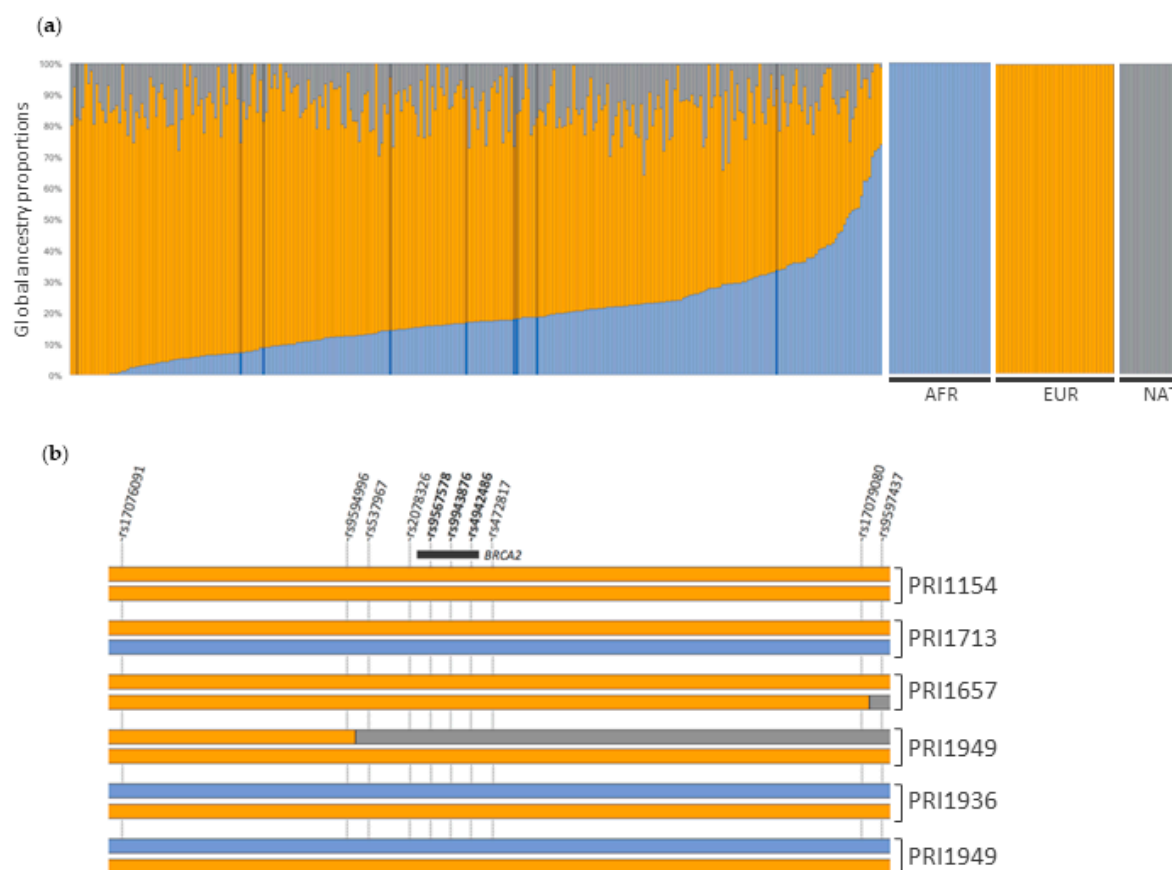

**Figure S2.** Global ancestry proportions in the study population and local ancestry at the *BRCA2* locus in E1308X mutation carriers. Global ancestry proportion (a) in study population in comparison to reference ancestral populations (African AFR, European EUR, and Native American NAT). *BRCA* pathogenic mutation carriers are illustrated by darker bars. Local ancestry estimates at the *BRCA2* locus in E1308X carriers (b). In B, only six of the eight *BRCA2* E1308X carriers are represented, which corresponds to the samples for which genome-wide SNP data was available.
